# Supplementary material
Source: Elsevier journal article supplement (https://www.sciencedirect.com/science/article/pii/S1413355519304113)
Supplement: mmc1 [file S1413355519304113:mmc1.pdf]

## Dimensões Globais do Questionário de Bournemouth

As escalas abaixo foram desenvolvidas para sabermos sobre a sua dor nas costas e como ela está te afetando. Por favor, responda **TODAS** as perguntas, circulando apenas **UM** número em **CADA** escala que melhor represente como você se sente.

1. Durante a última semana, em média, como você classificaria sua dor nas costas?

|         |   |   |   |   |   |   |   |   |   |    |                   |
|---------|---|---|---|---|---|---|---|---|---|----|-------------------|
| Sem dor |   |   |   |   |   |   |   |   |   |    | Pior dor possível |
| 0       | 1 | 2 | 3 | 4 | 5 | 6 | 7 | 8 | 9 | 10 |                   |

2. Ao longo da última semana, quanto sua dor nas costas interferiu nas atividades diárias (tarefas domésticas, tomar banho, colocar roupa, caminhar, subir/descer escadas, levantar-se/deitar-se da cama, levantar-se/ sentar-se na cadeira)?

|                |   |   |   |   |   |   |   |   |   |    |                                           |
|----------------|---|---|---|---|---|---|---|---|---|----|-------------------------------------------|
| Não interferiu |   |   |   |   |   |   |   |   |   |    | Impossibilitou a realização de atividades |
| 0              | 1 | 2 | 3 | 4 | 5 | 6 | 7 | 8 | 9 | 10 |                                           |

3. Ao longo da última semana, quanto sua dor nas costas interferiu nas suas atividades recreativas, sociais e/ou familiares?

|                |   |   |   |   |   |   |   |   |   |    |                                           |
|----------------|---|---|---|---|---|---|---|---|---|----|-------------------------------------------|
| Não interferiu |   |   |   |   |   |   |   |   |   |    | Impossibilitou a realização de atividades |
| 0              | 1 | 2 | 3 | 4 | 5 | 6 | 7 | 8 | 9 | 10 |                                           |

4. Ao longo da última semana, quão ansioso(a) você se sentiu (tenso(a), nervoso (a), irritado(a), com dificuldade para se concentrar/relaxar)?

|              |   |   |   |   |   |   |   |   |   |    |                      |
|--------------|---|---|---|---|---|---|---|---|---|----|----------------------|
| Nada ansioso |   |   |   |   |   |   |   |   |   |    | Extremamente ansioso |
| 0            | 1 | 2 | 3 | 4 | 5 | 6 | 7 | 8 | 9 | 10 |                      |

5. Ao longo da última semana, quão deprimido(a) você se sentiu (desanimado(a), triste, pessimista, infeliz)?

|                 |   |   |   |   |   |   |   |   |   |    |                         |
|-----------------|---|---|---|---|---|---|---|---|---|----|-------------------------|
| Nada depressivo |   |   |   |   |   |   |   |   |   |    | Extremamente depressivo |
| 0               | 1 | 2 | 3 | 4 | 5 | 6 | 7 | 8 | 9 | 10 |                         |

6. Ao longo da última semana, quanto você acha que seu trabalho (dentro ou fora de casa) afetou/afetaria na sua dor nas costas?

|            |   |   |   |   |   |   |   |   |   |    |              |
|------------|---|---|---|---|---|---|---|---|---|----|--------------|
| Não piorou |   |   |   |   |   |   |   |   |   |    | Piorou muito |
| 0          | 1 | 2 | 3 | 4 | 5 | 6 | 7 | 8 | 9 | 10 |              |

7. Ao longo da última semana, quanto você conseguiu controlar (reduzir/aliviar) sua dor nas costas por conta própria?

|                |   |   |   |   |   |   |   |   |   |    |                 |
|----------------|---|---|---|---|---|---|---|---|---|----|-----------------|
| Controle total |   |   |   |   |   |   |   |   |   |    | Nenhum controle |
| 0              | 1 | 2 | 3 | 4 | 5 | 6 | 7 | 8 | 9 | 10 |                 |
